# Supplementary material for: Reconstruction of hourly coastal water levels and counterfactuals without sea level rise for impact attribution
Source: Copernicus journal article supplement (doi:10.5194/essd-16-1121-2024), 2024-02-27
Supplement: Supplementary file 2 [file essd-16-1121-2024-supplement.zip]

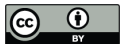

## *Supplement of*

# **Reconstruction of hourly coastal water levels and counterfactuals without sea level rise for impact attribution**

**Simon Treu et al.**

*Correspondence to:* Simon Treu ([simon.treu@pik-potsdam.de](mailto:simon.treu@pik-potsdam.de))

- [essd-16-1121-2024-supplement-title-page.pdf](#)
- Supplement
  - [Reconstruction of hourly coastal water levels and counterfactuals without sea level rise for impact attribution – Supplement.pdf](#)
  - [fs01.png](#)
  - [fs02ab.png](#)
  - [fs02c.png](#)

The copyright of individual parts of the supplement might differ from the article licence.
